# Supplementary material
Source: publisher figshare collection journal article supplement (https://acs.figshare.com/ndownloader/files/12118157)
Supplement: Supplementary file 1 [file 12118157]

## Supporting Information

### Rationally Design Hierarchical SnO<sub>2</sub>/1T-MoS<sub>2</sub> Nanoarray Electrode for Ultralong-life Li-S Batteries

*Maoxu Wang,<sup>†‡</sup> Lishuang Fan,<sup>†‡</sup> Da Tian,<sup>†‡</sup> Xian Wu,<sup>†‡</sup> Yue Qiu,<sup>†‡</sup> Chenyang Zhao,<sup>†‡</sup> Bin Guan,<sup>†‡</sup> Yan Wang,<sup>†</sup> Naiqing Zhang<sup>\*†‡</sup> and Kening Sun<sup>\*†‡</sup>*

<sup>†</sup>School of Chemistry and Chemical Engineering, State Key Laboratory of Urban Water Resource and Environment, Harbin Institute of Technology, Harbin, 150090 (China)  
<sup>‡</sup>Academy of Fundamental and Interdisciplinary Sciences, Harbin Institute of Technology, Harbin, 150001 (China)

<sup>\*</sup>Corresponding Author

Naiqing Zhang (znqmww@163.com)

Academy of Fundamental and Interdisciplinary Sciences, Harbin Institute of Technology, Harbin, China

Tel: +451 86412153      Fax: +86-451-86412153

## Experimental Section

**Synthesis of C@SnO<sub>2</sub>/TMS.** C@SnS<sub>2</sub> nanosheets precursor were prepared by a one-step hydrothermal method. Typically, 400 mg SnCl<sub>4</sub>, 400 mg Thioacetamide (TAA) and 20 mL isopropanol were stirred together for 30 min at room temperature, and then one piece of carbon cloth (2 cm \* 2 cm) was put into above solution. Then transferred to a 100 mL Taflon-lined stainless autoclave. Subsequently, the autoclave was sealed and heated at 180 °C for 24 h. Waiting for the autoclave cool to room temperature naturally, the carbon cloth was taken out and washed with water for three times. Then dried at 70 °C overnight and the C@SnS<sub>2</sub> nanosheets precursor was obtained. Porous C@SnS<sub>2</sub> nanosheets was fabricated via a high-temperature calcination method. Typically, the C@SnS<sub>2</sub> nanosheets was placed in a porcelain, and then transferred into a tube furnace. After annealed at 500 °C in air for 4 h, the porous C@SnO<sub>2</sub> nanosheets were prepared. Next, 92 mg Na<sub>2</sub>MoO<sub>4</sub>·2H<sub>2</sub>O, 152 mg L-cysteine, 56 mg NaBH<sub>4</sub>, 42 mL DMF and 28 mL deionized water were stirred for 30 min and then transferred into 100 mL Taflon-lined stainless autoclave. Then the C@SnO<sub>2</sub> was placed into the autoclave and sealed and heated at 200 °C for 12 h. After it cooling to room temperature, the carbon cloth was taken out and washed with water for at least 5 times. After dried at 70 °C for 6 h, the hierarchical porous C@SnO<sub>2</sub>/TMS nanosheets were obtained. The C@1T-MoS<sub>2</sub> was prepared in a similar procedure by using carbon cloth instead of C@SnO<sub>2</sub>. **Synthesis of C@SnO<sub>2</sub>/TMS/S.** The C@SnO<sub>2</sub>/TMS/S were prepared by a previously reported method. Briefly, 0.4 g sulfur was dissolve in 2 mL of CS<sub>2</sub>. Dry C@SnO<sub>2</sub>/TMS ( $\phi = 1$  cm) composite was completely soaked in the CS<sub>2</sub> solution for 5 min, and then dried out at 40 °C for 12 h. Finally, the C@SnO<sub>2</sub>/TMS/S composite placed in an autoclave and heated at 155 °C for 24 h with an average sulfur mass loading about 2.75 mg cm<sup>-2</sup>. The control groups of C@S, C@SnO<sub>2</sub>/S and C@1T-MoS<sub>2</sub>/S were prepared by the same method. In addition, the C@SnO<sub>2</sub>/TMS/S with a high sulfur loading 5.0 mg cm<sup>-2</sup> was prepared in a similar procedure by using 1.0 g sulfur instead of 0.3 g sulfur.

**Synthesis of Li<sub>2</sub>S<sub>x</sub> solution.** Li<sub>2</sub>S<sub>x</sub> solution was prepared by mixing Li<sub>2</sub>S and sulfur, and then dissolve into the solution of volume ratio 1:1 of 1,2-dimethoxyethane (DME)

and 1,3-dioxolane (DOL) with 0.1 mol/L lithium bis (trifluoromethanesulfonyl) imide (LiTFSI) stirred for various hours to fabricate the concentration of 1.0 mg mL<sup>-1</sup> Li<sub>2</sub>S<sub>x</sub> solution.

**Materials characterization.** SEM (Hitachi, SU8010) and HRTEM (G2 F20FEI Tecnai G2 F20 microscope at 200 kV) were utilized to characterize the microstructure of the samples. And the element mapping was recorded by EDX spectroscope attached with TEM. The X-ray diffraction (PANalytical X'Pert PRO, monochromated Cu K $\alpha$  radiation 40 mA, 40 kV) was used to determine the crystal phases of samples. XPS analysis was performed at room temperature to analyze the compositions and contents of element. The energy resolution is 0.5 eV and the step size is 0.1 eV. The ASAP 2020 (Micromeritics) was used to investigate the specific surface area and N<sub>2</sub> adsorption/desorption isotherms. The thermogravimetric analysis (TGA, Shimadzu DRG-60) was used to determine the component contents of the sample.

**Electrochemical Measurements.** The C@SnO<sub>2</sub>/TMS/S was used as the electrode without additional conductive additive and insulating binder. Celgard 3501 sheets as the separator and the 2025 coin cells were assembled in a glovebox filled with Ar with the Li metal disc as the counter electrode. The electrolyte was composed of 1 mol/L lithium bis (trifluoromethanesulfonyl) imide (LiTFSI) in a solvent of 1, 3-dioxolane (DOL) and dimethoxymethane (DME) (1:1 ratio by volume) with 2% LiNO<sub>3</sub> addition. The Neware battery test system was used to carry out the charge-discharge performance, and the voltage windows is 1.7-2.8 V. The CV measurements were recorded with a CHI600D electrochemical workstation from 1.7 to 2.8 V. The EIS measurements were investigated by PARSTAT 2273 advanced electrochemical system, and the frequency range from 1 MHz to 1 Hz. In addition, the measurement time is about 24 h after cell assembly.

**Theoretical Computation.** The first principle calculations were conducted, using spin-polarized Perdew–Burke–Ernzerhof (PBE) exchange-correlation functional in the framework of CASTEP in Materials Studio of Accelrys Inc. The CI-NEB is applied for computing diffusion, which is an improved algorithm of the traditional NEB method and is more efficient in obtaining the minimum energy path between the

given initial and final positions with linear interpolation of the diffusion coordinates

## Results

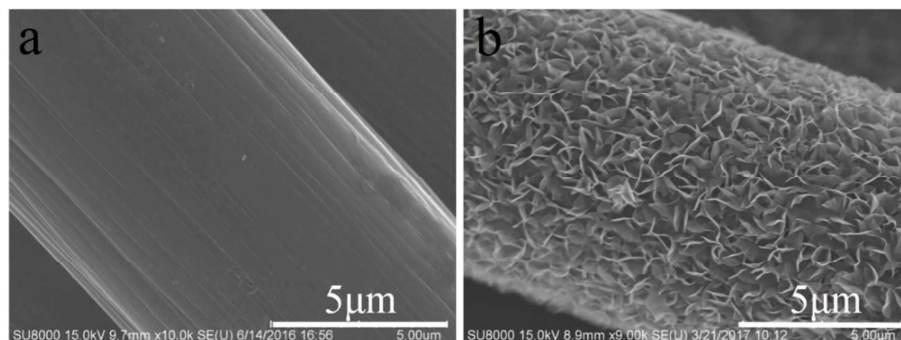

**Figure S1.** SEM images of a) Carbon cloth and b) C@SnS<sub>2</sub>.

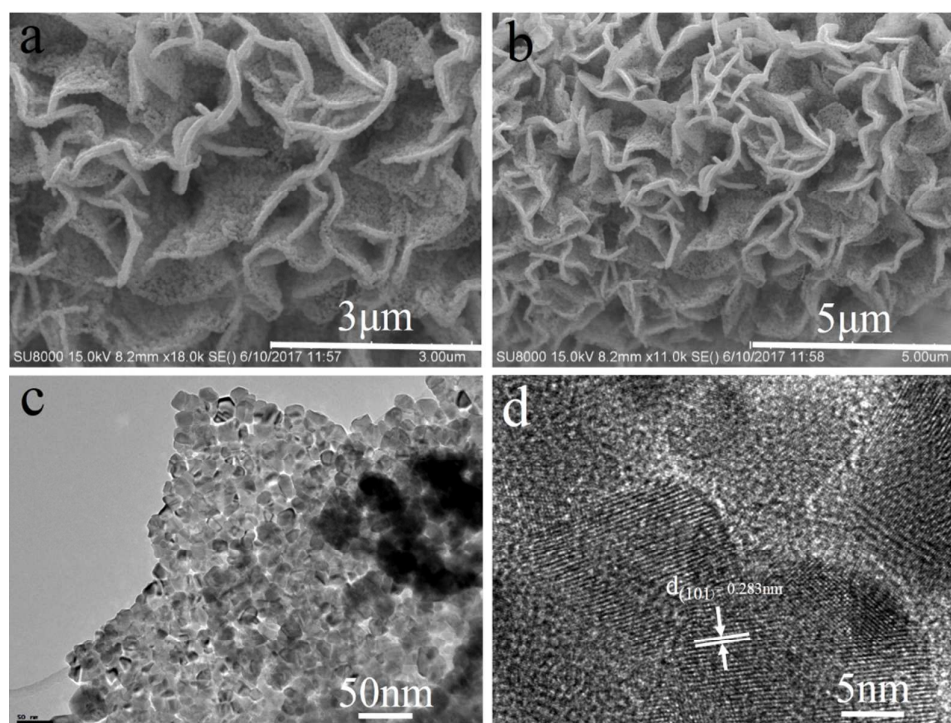

**Figure S2.** SEM images of C@SnO<sub>2</sub> porous nanosheets. a) 3 μm; b) 5 μm. c) TEM image of SnO<sub>2</sub>; d) HRTEM of SnO<sub>2</sub>.

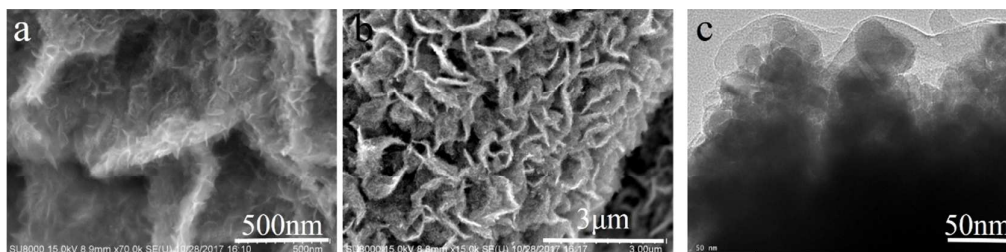

**Figure S3.** a, b) SEM images of C@SnO<sub>2</sub>/TMS nanosheets and c) TEM image of SnO<sub>2</sub>/TMS.

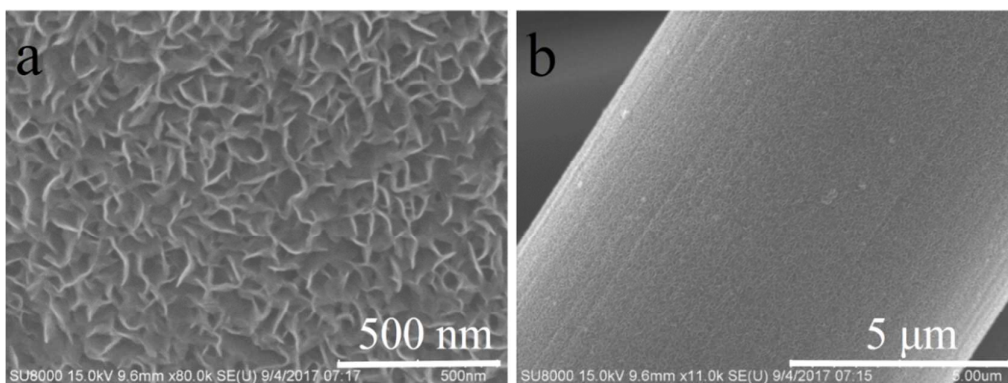

**Figure S4.** SEM images of C@MoS<sub>2</sub> nanosheets. a) 500 nm; b) 5 μm.

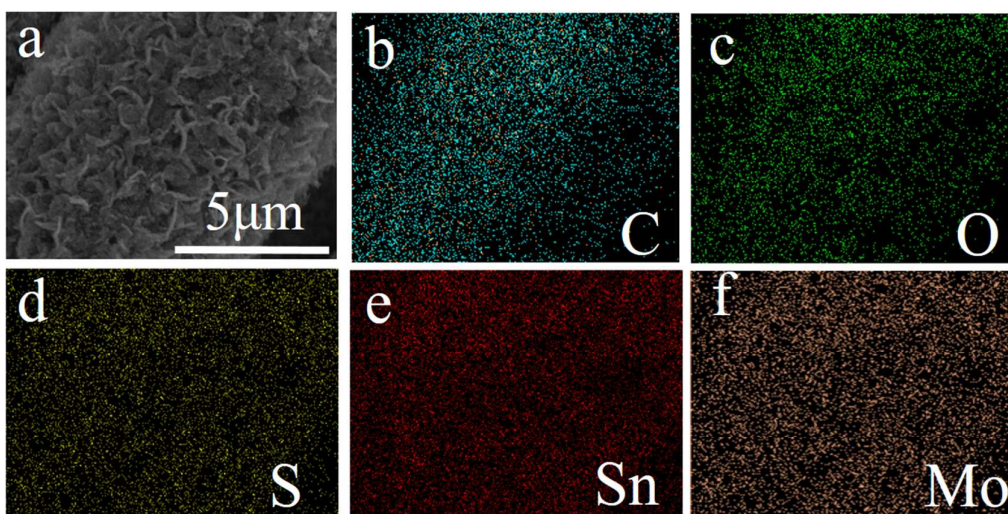

**Figure S5.** a) SEM image and corresponding EDS mapping of C@SnO<sub>2</sub>/TMS sample b) C; c) O; d) S; e) Sn; f) Mo.

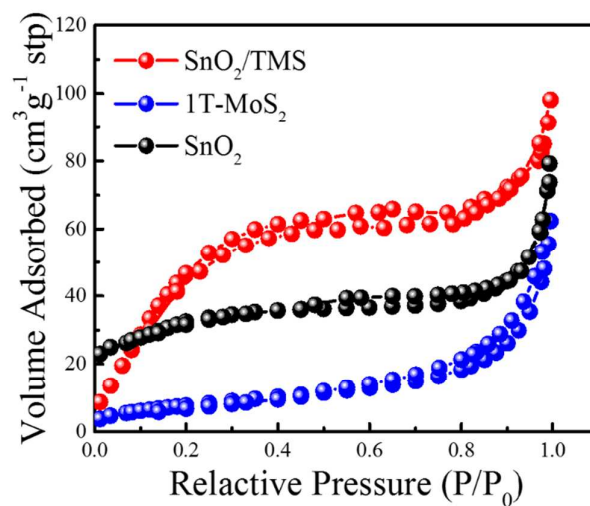

**Figure S6.** The N<sub>2</sub> isothermal adsorption and desorption curves of SnO<sub>2</sub>, 1T-MoS<sub>2</sub> and

SnO<sub>2</sub>/TMS composites.

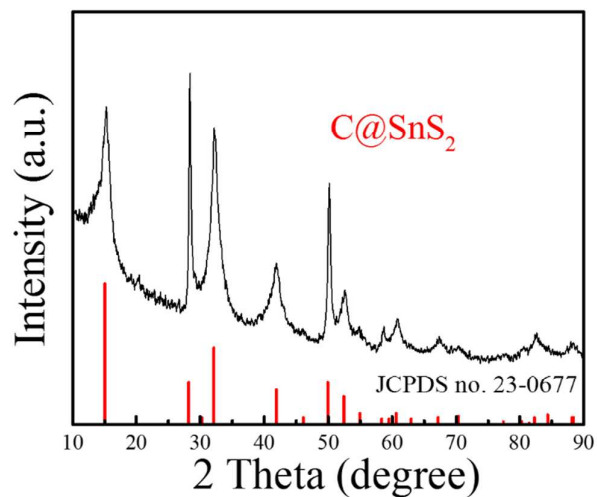

**Figure S7.** XRD pattern of C@SnS<sub>2</sub> sample.

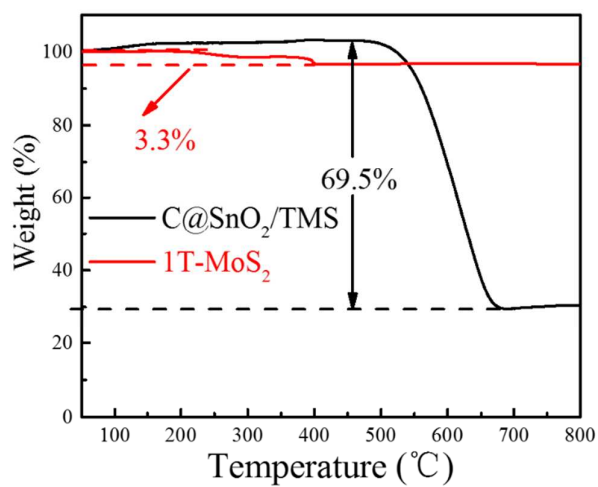

**Figure S8.** The TGA curves of C@SnO<sub>2</sub>/TMS and 1T-MoS<sub>2</sub> in Air with a rate of 2°C/min.

**Table S1.** Element content of C@SnO<sub>2</sub>/TMS materials by XPS results.

| Name             | C     | Sn    | O     | Mo   | S     |
|------------------|-------|-------|-------|------|-------|
| Atomic ratio (%) | 32.48 | 14.85 | 32.83 | 6.52 | 13.32 |



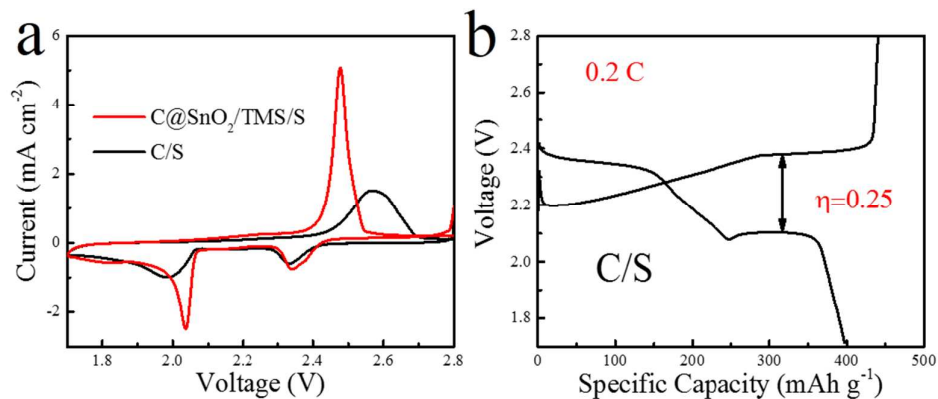

**Figure S9.** a) The CV profiles recorded at 0.1 mV s<sup>-1</sup> from 1.7 V to 2.8 V of C@SnO<sub>2</sub>/TMS/S and C/S. b) Representative charge-discharge voltage profiles at 0.2 C of C/S.

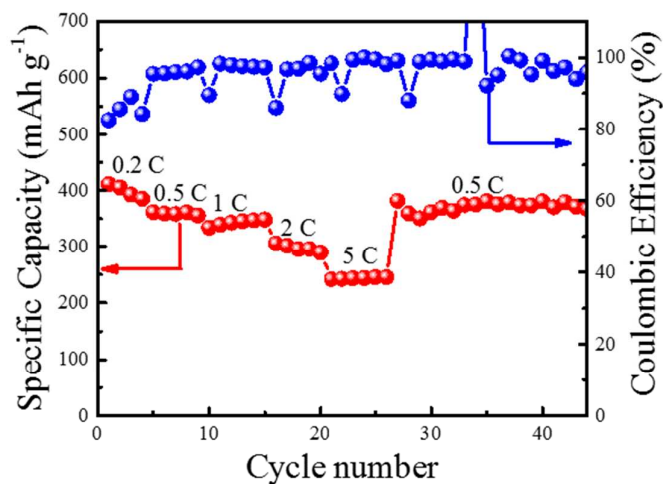

**Figure S10.** The rate performance of C/S from 0.2 C to 5 C.

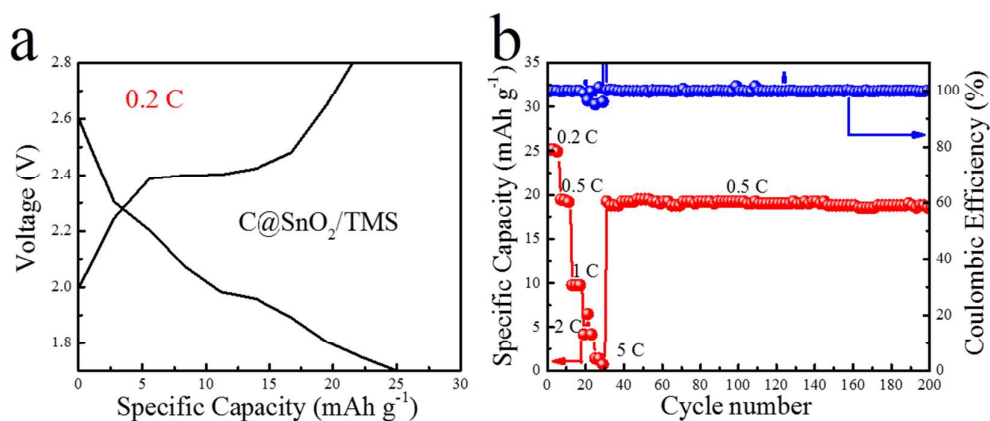

**Figure S11.** a) Representative charge-discharge voltage profiles of C@SnO<sub>2</sub>/TMS as the Li-ion batteries in the Li-S system at 0.2 C. b) The rate performance of C@SnO<sub>2</sub>/TMS from 0.2 C to 5 C in the Li-S system.

**Table S2.** A brief summary of the typical array electrode materials for Li–S batteries

| Materials Type          | Rate  | Sulfur loading<br>(mg/cm <sup>2</sup> ) | Initial Capacity<br>(mAh/g) | Cycle Number | Cycled Capacity<br>(mAh/g) | Decay Per Cycle | Ref.      |
|-------------------------|-------|-----------------------------------------|-----------------------------|--------------|----------------------------|-----------------|-----------|
| C@SnO <sub>2</sub> /TMS | 0.5 C | 2.75                                    | 1261                        | 200          | 1175                       | 0.034%          | This work |
|                         | 5 C   | 2.75                                    | 710                         | 4000         | 448                        | 0.009%          |           |
| C@WS <sub>2</sub>       | 0.5 C | 1.5                                     | 1200                        | 200          | 1000                       | 0.08%           | 1         |
| Polymer                 | 0.5 C | 2.1                                     | 1050                        | 200          | 860                        | 0.09%           | 2         |
| ReS <sub>2</sub>        | 0.5 C | 2.0                                     | 920                         | 200          | 800                        | 0.063%          | 3         |
| MnO <sub>2</sub>        | 0.2 C | 2.4                                     | 1000                        | 100          | 900                        | 0.1%            | 4         |
| TiO <sub>2</sub>        | 1 C   | 1.5-2.0                                 | 871                         | 700          | 608                        | 0.045%          | 5         |

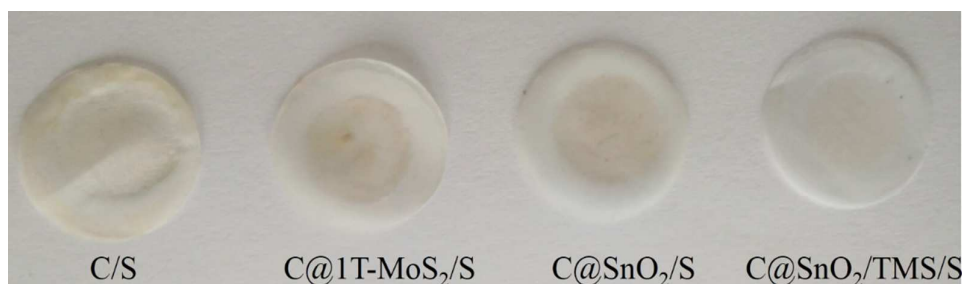**Figure S12.** Photograph images of the separators of C/S, C@1T-MoS<sub>2</sub>/S, C@SnO<sub>2</sub>/S and C@SnO<sub>2</sub>/TMS/S electrodes after 200 cycles at 0.5 C.

## References

1. Lei, T.; Chen, W.; Huang, J.; Yan, C.; Sun, H.; Wang, C.; Zhang, W.; Li, Y.; Xiong, J., Multi-Functional Layered WS<sub>2</sub> Nanosheets for Enhancing the Performance of Lithium-Sulfur Batteries. *Adv. Energy Mater.* **2017**, 7, 1601843.
2. Wu, F.; Zhao, E.; Gordon, D.; Xiao, Y.; Hu, C.; Yushin, G., Infiltrated Porous Polymer Sheets as Free-Standing Flexible Lithium-Sulfur Battery Electrodes. *Adv. Mater.* **2016**, 28, 6365-6371.
3. Gao, J.; Li, L.; Tan, J.; Sun, H.; Li, B.; Idrobo, J. C.; Singh, C. V.; Lu, T. M.; Koratkar, N., Vertically Oriented Arrays of ReS<sub>2</sub> Nanosheets for Electrochemical Energy Storage and Electrocatalysis. *Nano lett.* **2016**, 16, 3780-3787.
4. Xu, H.; Qie, L.; Manthiram, A., An Integrally-Designed, Flexible Polysulfide Host for High-Performance Lithium-Sulfur Batteries with Stabilized Lithium-Metal Anode. *Nano Energy* **2016**, 26, 224-232.
5. Lei, T.; Xie, Y.; Wang, X.; Miao, S.; Xiong, J.; Yan, C., TiO<sub>2</sub> Feather Duster as Effective Polysulfides Restrictor for Enhanced Electrochemical Kinetics in Lithium-Sulfur Batteries. *Small* **2017**, 13, 1701013.
